# Supplementary material
Source: publisher figshare collection journal article supplement (https://sage.figshare.com/ndownloader/files/21481692)
Supplement: Supplementary file 1 [file 21481692]

|  | **On-Table** (n=8386 reporting) | **Off-Table** (n=3940 reporting) |
| --- | --- | --- |
| Total Intra-Operative Fractures | 1.7% (n=144) | 1.3% (n=52) |
| Calcar | 0.5% (n=43) | 0.3% (n=10) |
| Greater Trochanter | 0.6% (n=53) | 0.2% (n=9) |
| Proximal Femur | 0.1% (n=7) | 0.5% (n=18) |
| Femoral Perforations | 0.1% (n=7) | 0.3% (n=1) |
| Other | Acetabulum 0.02% (n=2)  Posterior column pelvis 0.01% (n=1) | N/A |
| Unspecified | 0.4% (n=31) | 0.4% (n=14) |

**Appendix 3.** Intraoperative Fractures
